# Supplementary material for: Prediction of the optimal depth for superior vena cava cannulae with cardiac computed tomography during minimally invasive cardiac surgery: a prospective observational cohort study
Source: BMC Anesthesiol. 2017 Apr 7;17:56. doi: 10.1186/s12871-017-0347-x (PMC5383961; doi:10.1186/s12871-017-0347-x)
Supplement: Additional file 1: — The dataset. This file shows the dataset of our study. (XLSX 14 kb) [file 12871_2017_347_MOESM1_ESM.xlsx]

## Sheet: cardiac CT
patient number	age (years)	height (cm)	weight (kg)	distance_A (cm)		distance_B1 (cm)	distance_B2 (cm)	distance_C (cm)
1	40	178.4	91.8	5	178.4	13.7	12.8	12		distance_A = the shortest straight distance between the insertion point of the needle and the level of the upper border of the clavicular sternal head
2	55	156.7	55.35	5	156.7	11.2	11	11		distance_B 1 =the distance between the upper border of the clavicular sternal head and the SVC-RA junction in the coronal planes of the cardiac CT, measured by investigator 1
3	64	165.6	64.41	5.5	165.6	11.4	11.5	11		distance_B 2 =the distance between the upper border of the clavicular sternal head and the SVC-RA junction in the coronal planes of the cardiac CT, measured by investigator 2
4	59	168.2	65.2	7	168.2	12.2	13.8	10.5		distance_C = the distance mesured by surgeon's inspection
5	54	170.9	67.6	8	170.9	8.3	9.4	7
6	36	175.1	65.8	7	175.1	8.7	9.1	7
7	48	181.5	102.8	5.5	181.5	12.2	14.3	11
8	52	162.1	60.75	5	162.1	12	11.8	9
9	54	165	64.1	5.5	165	11.7	12.6	9
10	36	158	50.5	5.5	158	10.9	10.9	11
11	53	156.2	65.2	5	156.2	11.4	11.1	10
12	36	158	53.1	5.5	158	10.2	10	9
13	54	150.6	48.05	6	150.6	11.1	11	11.5
14	42	164.8	66.1	6	164.8	9.9	10.5	9
15	57	162.4	58.2	5.5	162.4	9.6	9.7	8.5
16	50	156.4	57.1	5.5	156.4	10.6	10.7	12
17	43	172.2	90.6	7	172.2	10.4	10.2	9
18	50	166	69.6	5	166	12.9	13.5	12
19	69	150.9	53.4	5	150.9	9	8.6	10.5
20	52	146.8	50.6	5.5	146.8	10.3	9.3	8
21	29	167.4	58.7	5	167.4	11.4	11.3	11
22	71	167.5	80.9	6	167.5	12.5	13	12
23	69	149.4	55.35	6	149.4	9.4	10	8
24	28	176.6	75.5	7	176.6	9.5	10.7	9.5
25	53	175.8	66.2	6	175.8	12.4	12	11
26	70	151.3	55	6	151.3	9.9	11.8	9.5
27	46	164.7	64	5	164.7	10.9	11.1	10
28	40	176.2	88.1	6	176.2	11.5	12.5	9
29	55	169.9	69	8	169.9	10.6	11.6	9
30	60	155.8	65.9	4	155.8	9.4	11.5	9
31	61	170.5	78.35	7	170.5	12.4	14	10
32	45	159.1	60.3	6.5	159.1	10.9	12	9
33	66	164.4	78.25	6	164.4	13	13.7	10.5
34	61	171.3	70.7	7.5	171.3	11.3	12.1	9.5
35	41	180	74	7.5	180	12	13.5	11.5
36	65	164.6	62.05	5	164.6	12.4	12.9	13
37	46	177.4	80.6	5	177.4	13	12.2	11.5
38	71	158	66.8	6	158	9.7	10.2	9
39	42	163	54.35	6	163	11.4	11.5	10
40	28	168.7	55.35	6.5	168.7	9	9.5	8
41	51	158.4	54.1	7	158.4	10.9	12	9.5
42	53	160.7	58.7	6	160.7	13.9	13.8	11.5
43	45	163.5	59	6	163.5	11.4	11.6	9
44	50	163	45.3	7	163	13.5	13.9	12
45	49	166	62	7	166	11.5	11.5	10
46	68	174.1	65	7	174.1	11.2	11.2	10

## Sheet: CXR
patient number	distance_1 (cm)	distance_2 (cm)
1	5.2	5.2		distance_1 = the distances between the upper border of the clavicular sternal head and the carina level on preoperative chest radiography with a postero-anterior projection
2	4.8	5.6		distance_2 = the distances between the upper border of the clavicular sternal head and the carina level on preoperative chest radiography with an antero-posterior projection
3	4.1	3.8
4	4.5	4.5
5	2.3	2.4
6	3.2	3.1
7	4.4	4.4
8	3	3.3
9	3.4	3.3
10	3.9	3.7
11	4.2	5.2
12	3.2	3.2
13	5.3	5.5
14	4.4	4.8
15	3.7	3.6
16	7.1	7.1
17	4.2	4.3
18	5.9	4.1
19	4.6	5.3
20	3.3	3.3
21	4.9	4.6
22	4.5	5
23	3.9	3.9
24	4.5	4.5
25	4.2	4.4
26	4.3	4.8
27	5.1	4.9
28	4.3	4.4
29	4.1	4.1
30	4	3.6
31	2.7	3.1
32	2.9	3.2
33	5.1	5.6
34	3.2	3.7
35	5	5.8
36	5.9	5.6
37	5.8	5.5
38	4.7	4.7
39	3.9	4.2
40	4.3	4.3
41	3.4	3.4
42	5.2	5.5
43	4.4	4.3
44	4.7	4.6
45	4.7	4.7
46	5.2	5.1
